# Supplementary material
Source: PubMed Central journal article supplement (PMC11108475)
Supplement: 18_2015_2040_MOESM1_ESM.pdf [file 18_2015_2040_MOESM1_ESM.pdf]

a

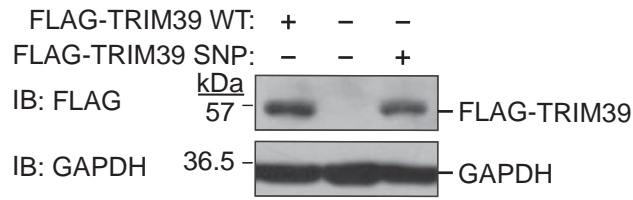

b

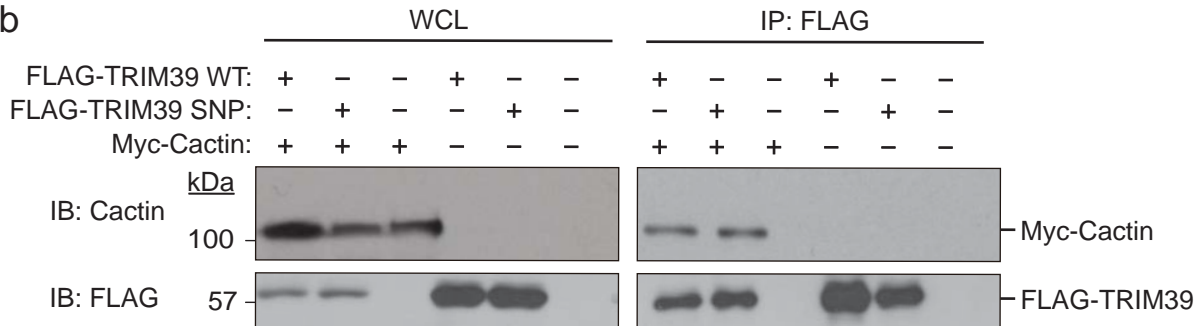

**Figure S1.** Interaction between Cactin and TRIM39 SNP. **a** Expression of TRIM39 WT and TRIM39 SNP. Expression vectors encoding FLAG-tagged TRIM39 WT or TRIM39 SNP were transfected into HEK293T cells. Cell lysates (WCL) were immunoblotted with anti-FLAG antibody and anti-GAPDH antibody. **b** TRIM39 SNP also interacts with Myc-Cactin as TRIM39 WT does. Expression vectors encoding FLAG-tagged TRIM39 WT or TRIM39 SNP were transfected with Myc-Cactin into HEK293T cells. Cell lysates (WCL) were immunoprecipitated with anti-FLAG antibody and immunoblotted with anti-FLAG antibody and anti-Cactin antibody.
