# Supplementary material
Source: PubMed Central journal article supplement (PMC11108475)
Supplement: 18_2015_2040_MOESM2_ESM.pdf [file 18_2015_2040_MOESM2_ESM.pdf]

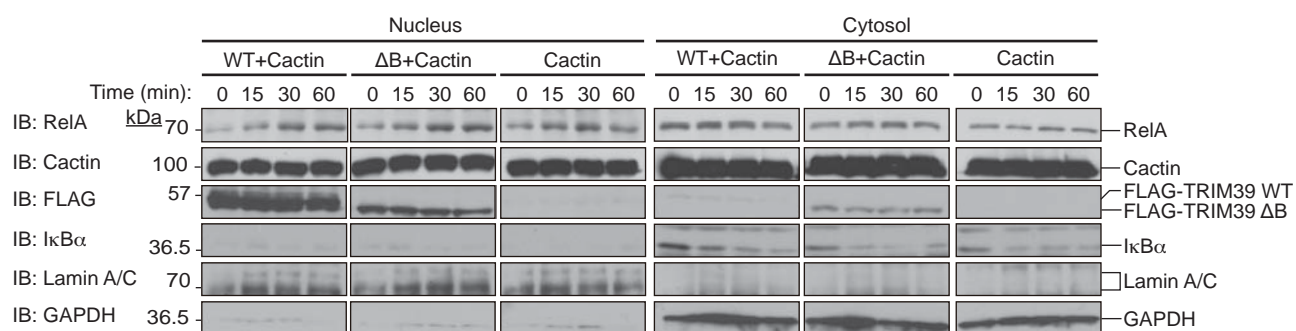

**Figure S2.** Translocation of RelA/p65 after TNF $\alpha$  stimulation with/without overexpression of TRIM39 WT or  $\Delta$ B and Cactin. HEK293T cells were transfected with expression plasmids encoding FLAG-tagged TRIM39 WT or TRIM39  $\Delta$ B and Myc-tagged Cactin. Forty-eight h after transfection, the cells were incubated with TNF $\alpha$  (20 ng/ml) for the indicated times. The cytoplasmic extract (Cytosol) and nuclear extract (Nucleus) were fractionated and analyzed by Western blotting with the indicated antibodies.
