# Supplementary material
Source: PubMed Central journal article supplement (PMC11108475)
Supplement: 18_2015_2040_MOESM3_ESM.pdf [file 18_2015_2040_MOESM3_ESM.pdf]

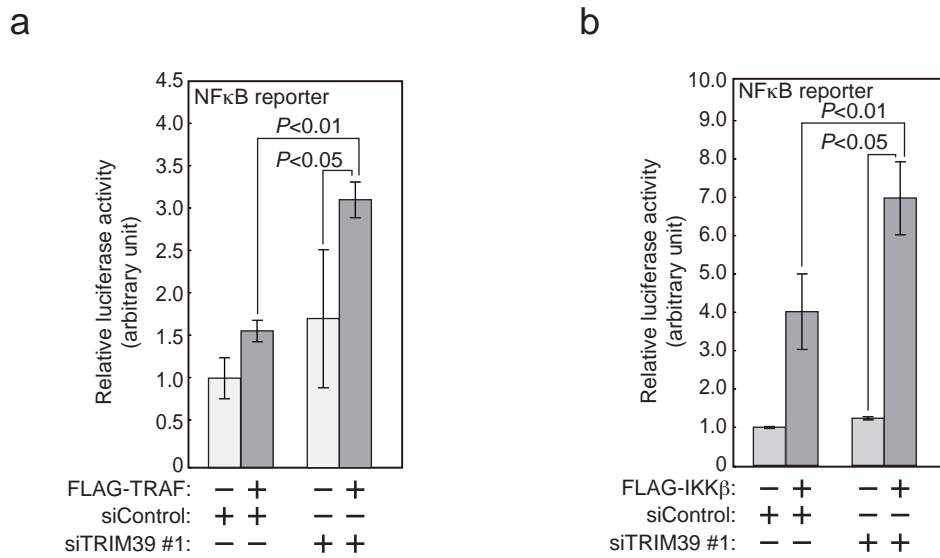

**Figure S3.** Effect of TRIM39 on NFκB-mediated transcriptional activity after TRAF2 or IKKβ overexpression. **a** Effect of TRIM39 on NFκB-mediated transcriptional activity after TRAF2 overexpression. HEK293T cells were transfected with siTRIM39 #1 or non-targeting siRNA (siControl). Twenty-four h after knockdown, NFκB reporter plasmids and TRAF2 expression vector were transfected into cells. Thirty-six h later, the cells were harvested and assayed by the Dual-Luciferase Reporter Assay System. Luciferase activity is expressed as the ratio to normalized activity of cells that had been transfected with siControl. Data are means ± standard deviation (s.d.) of values from three independent experiments. **b** Effect of TRIM39 on NFκB-mediated transcriptional activity after IKKβ overexpression. HEK293T cells were transfected with siTRIM39 #1 or siControl. Twenty-four h after knockdown, NFκB reporter plasmids and IKKβ expression vector were transfected into cells. Thirty-six h later, the cells were harvested and assayed by the Dual-Luciferase Reporter Assay System. Luciferase activity is expressed as the ratio to normalized activity of cells that had been transfected with siControl. Data are means ± standard deviation (s.d.) of values from three independent experiments.
