# Supplementary material
Source: PubMed Central journal article supplement (PMC11108475)
Supplement: 18_2015_2040_MOESM4_ESM.pdf [file 18_2015_2040_MOESM4_ESM.pdf]

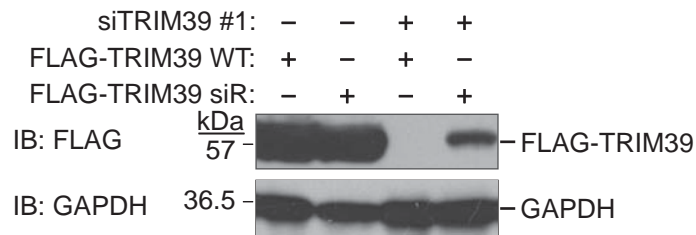

**Figure S4.** Expression of TRIM39 siR in cells in which TRIM39 is knocked down. HEK293T cells were transfected with siRNA specific for human TRIM39 (siTRIM39) or non-targeting siRNA as a control (siControl). Twenty-four h after transfection, the cells were transfected with expression vectors encoding FLAG-tagged TRIM39 WT or TRIM39 siR, which is resistant to siTRIM39 knockdown. Cell lysates (WCL) were immunoblotted with anti-FLAG or anti-GAPDH antibody.
