# Supplementary material
Source: PubMed Central journal article supplement (PMC11108475)
Supplement: 18_2015_2040_MOESM5_ESM.pdf [file 18_2015_2040_MOESM5_ESM.pdf]

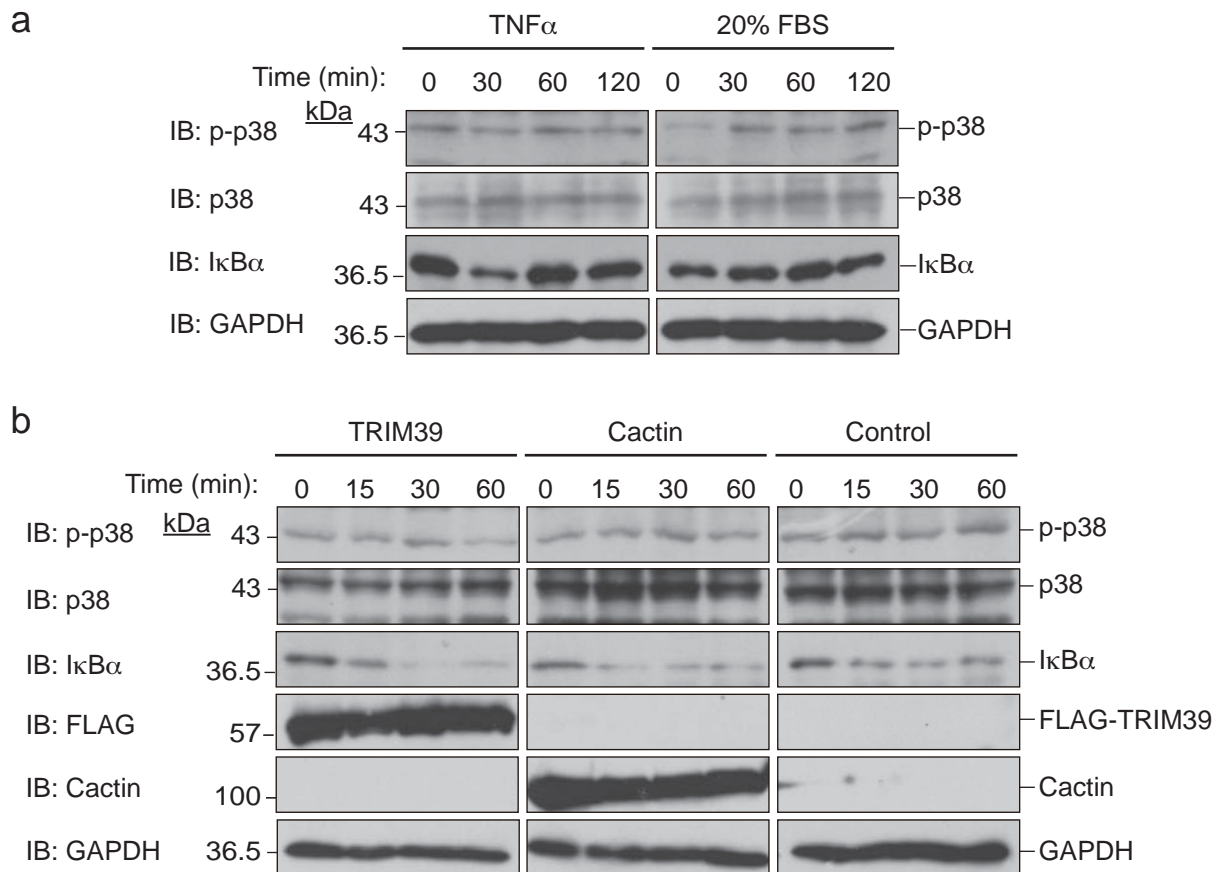

**Figure S5.** TRIM39 and Cactin do not affect the MAPK pathway. **a** MAPK activation in HEK293T cells used in this study by stimulation with TNF $\alpha$  or FBS. HEK293T cells were incubated with TNF $\alpha$  (20 ng/ml) for the indicated times. Cell lysates were then subjected to immunoblot analysis with the indicated antibodies (left column). HEK293T cells were incubated with DMEM with 0.1% calf serum (CS). After 24-h incubation, cells were cultured in DMEM with 20% FBS for the indicated times. Cell lysates were then subjected to immunoblot analysis with the indicated antibodies (right column). **b** TRIM39 or Cactin overexpression does not affect MAPK activity after stimulation with TNF $\alpha$ . HEK293T cells were transfected with expression vectors for FLAG-tagged TRIM39 WT, Myc-tagged Cactin, or an empty vector (control). The cells were then incubated with TNF $\alpha$  (20 ng/ml) for the indicated times. Cell lysates were subjected to immunoblot analysis with the indicated antibodies.
