# Supplementary material
Source: PubMed Central journal article supplement (PMC11108475)
Supplement: 18_2015_2040_MOESM6_ESM.pdf [file 18_2015_2040_MOESM6_ESM.pdf]

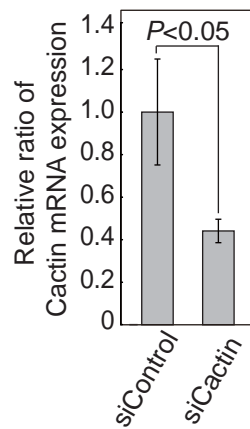

**Figure S6.** Quantification of *Cactin* mRNA in HEK293T cells transfected with siRNA specific for human Cactin. HEK293T cells were transfected with siRNA specific for human Cactin (siCactin) or non-targeting siRNA as a control (siControl: non-targeting siRNA). Forty-eight h after transfection, quantitative real-time PCR was performed. *Cactin* mRNA expression is indicated as the ratio to the value of HEK293T cells transfected with siControl. Data are means  $\pm$  standard deviation (s.d.) of values from three independent experiments. *P* values for the indicated comparisons were determined by Student' *s t* test.
